# Supplementary material for: Analysis of combining ability and stability of yield characteristics of upland cotton in two years
Source: PeerJ. 2025 Jul 30;13:e19716. doi: 10.7717/peerj.19716 (PMC12317688; doi:10.7717/peerj.19716)
Supplement: Supplemental Information 1 [file peerj-13-19716-s001.xlsx]

## Sheet: Sheet1
env	fem	male	gen	cross	blk	boll number per plant	seed cotton per plant	leather cotton per plant	boll weight	cotton lint percentage	seed index
1	1	1	11	0	1	3.7	19.454	7.895	5.25784	0.428964	13.5351
1	1	2	12	1	1	5.28571	28.7571	13.4	5.44054	0.465971	11.5096
1	1	3	13	1	1	5.55	27.91	13.33	5.02883	0.477607	10.2893
1	1	4	14	1	1	4.6	28.54	12.79	6.20435	0.448143	10.6852
1	1	5	15	1	1	3.13889	31.4496	14.8085	5.15752	0.461222	10.4527
1	1	6	16	1	1	5.8	31.725	15.729	5.46983	0.495792	11.047
1	1	7	17	1	1	5.88889	32.0844	14.48	5.4483	0.451309	11.0411
1	2	2	22	0	1	4.17857	21.32	11.0114	5.10222	0.494117	9.40808
1	2	3	23	1	1	3.77778	20.8544	10.9967	5.52029	0.511424	10.6308
1	2	4	24	1	1	5	24.916	11.573	4.9832	0.464481	11.147
1	2	5	25	1	1	6.5	36.27	17.67	5.58	0.487179	11.4886
1	2	6	26	1	1	5	27.08	12.99	5.416	0.47969	11.1208
1	2	7	27	1	1	3.9	19.512	9.758	5.00308	0.500103	10.8862
1	3	3	33	0	1	5.2	20.69	10.53	3.97885	0.508942	9.3987
1	3	4	34	1	1	5.4	27.14	12.64	5.02593	0.465733	10.8668
1	3	5	35	1	1	7.22222	36.8289	17.7267	5.09938	0.481325	10.1909
1	3	6	36	1	1	5.6	30.692	14.431	5.48071	0.470188	10.8624
1	3	7	37	1	1	6.03246	31.377	14.6507	5.43125	0.475719	10.0796
1	4	4	44	0	1	6.05	37.112	16.196	6.13421	0.436409	12.1851
1	4	5	45	1	1	4.6	22.373	10.15	4.8637	0.453672	10.4649
1	4	6	46	1	1	5.3	29.124	13.199	5.49509	0.4532	10.8777
1	4	7	47	1	1	6.2	33.67	15.58	5.43065	0.462726	10.7871
1	5	5	55	0	1	6.05	29.29	13.194	4.84132	0.450461	10.4316
1	5	6	56	1	1	6	25.7	12.3	5.40568	0.478599	10.4688
1	5	7	57	1	1	6.5	34.0625	15.8038	5.24038	0.463963	10.2722
1	6	6	66	0	1	9.45	48.17	21.85	5.09735	0.453602	11.2191
1	6	7	67	1	1	4.35	25.797	11.715	5.93034	0.454123	10.4933
1	7	7	77	0	1	7.72222	44.2778	19.9233	4.96382	0.449962	10.0731
1	1	1	11	0	2	6.8	33.216	14.02	4.88471	0.422086	12.6874
1	1	2	12	1	2	5.28571	28.7571	13.4	5.44054	0.465971	11.5096
1	1	3	13	1	2	7.45	42.004	20.295	5.63812	0.483168	11.9411
1	1	4	14	1	2	5.55556	33.7222	15.6	6.07	0.462603	10.7444
1	1	5	15	1	2	7.05	44.11	21.06	6.25674	0.477443	11.2824
1	1	6	16	1	2	5.8	31.725	15.729	5.46983	0.495792	11.047
1	1	7	17	1	2	5.88889	32.0844	14.48	5.4483	0.451309	11.0411
1	2	2	22	0	2	7.57143	43.3914	21.2443	5.73094	0.489596	10.3908
1	2	3	23	1	2	6.3	31.881	16.274	5.06048	0.510461	10.7338
1	2	4	24	1	2	7.30556	44.37	20.7911	6.07346	0.468585	10.9783
1	2	5	25	1	2	9	46.7	22.2909	5.18889	0.477321	10.8925
1	2	6	26	1	2	6	32.56	16.07	5.42667	0.49355	10.7637
1	2	7	27	1	2	3.9	19.512	9.758	5.00308	0.500103	10.8862
1	3	3	33	0	2	5.2	20.69	10.53	3.97885	0.508942	9.3987
1	3	4	34	1	2	7.3	43.85	20.49	6.00685	0.467275	11.6759
1	3	5	35	1	2	7.9	40.11	18.57	5.07722	0.462977	10.6898
1	3	6	36	1	2	6.2	34.957	16.605	5.63823	0.475012	10.4689
1	3	7	37	1	2	6.5	34.15	15.881	5.25385	0.465037	9.85915
1	4	4	44	0	2	6.8	42.284	18.366	6.21824	0.434349	12.3671
1	4	5	45	1	2	6.6	39.378	18.621	5.96636	0.472878	11.1837
1	4	6	46	1	2	5.65	26.586	11.957	4.70549	0.449748	11.091
1	4	7	47	1	2	6.8	42.953	19.554	5.53022	0.455242	11.2984
1	5	5	55	0	2	6.88889	33.0889	14.0444	4.80323	0.444449	9.8111
1	5	6	56	1	2	7	42	19.7	4.95871	0.469048	10.3241
1	5	7	57	1	2	6.5	34.0625	15.8038	5.24038	0.463963	10.2722
1	6	6	66	0	2	9.45	48.17	21.85	5.09735	0.453602	11.2191
1	6	7	67	1	2	5.4	27.2	12.65	5.03704	0.465074	11.2009
1	7	7	77	0	2	11.6071	57.2029	26.1186	4.92825	0.456596	10.1111
2	1	1	11	0	1	6.1	33.6226	14.504	5.5119	0.412496	10.9
2	1	2	12	1	1	6.52741	40.3311	17.3477	5.85309	0.426969	11.352
2	1	3	13	1	1	6.4	32.3212	15.202	5.05019	0.453047	10.1297
2	1	4	14	1	1	3.6	21.1908	8.882	5.88633	0.419144	10.6847
2	1	5	15	1	1	6.8	41.0548	17.482	6.03747	0.425821	11.1403
2	1	6	16	1	1	4.2	24.8812	9.464	5.9241	0.41109	12.2944
2	1	7	17	1	1	9.52078	58.6183	24.7203	5.78586	0.423246	11.6217
2	2	2	22	0	1	3.4	19.584	8.434	5.76	0.430658	11.3313
2	2	3	23	1	1	5.6	31.058	14.052	5.54607	0.452444	11.5273
2	2	4	24	1	1	3.6	21.8498	8.97231	6.06938	0.410636	12.3021
2	2	5	25	1	1	8.6	44.808	19.158	5.21023	0.427558	10.8715
2	2	6	26	1	1	4	20.6434	9.064	5.16085	0.439075	10.7018
2	2	7	27	1	1	6.76782	36.2071	16.603	5.71293	0.452882	10.743
2	3	3	33	0	1	6	32.7008	14.59	5.45013	0.446166	11.0029
2	3	4	34	1	1	5	39.4751	16.6668	5.19652	0.41767	10.7473
2	3	5	35	1	1	6.6	38.5064	16.8	5.8343	0.436291	12.14
2	3	6	36	1	1	5.2	28.7442	11.806	5.52773	0.410726	10.7204
2	3	7	37	1	1	11.1059	59.4121	26.8607	5.14875	0.454335	10.6192
2	4	4	44	0	1	9.5	54.297	22.478	5.71547	0.413982	10.7135
2	4	5	45	1	1	7.29	33.3864	14.858	5.7366	0.424684	11.3302
2	4	6	46	1	1	5.2	27.5174	10.792	5.29181	0.392188	11.5348
2	4	7	47	1	1	5.4	37.9112	15.7504	5.25642	0.411228	9.81823
2	5	5	55	0	1	4.31	21.8855	9.10884	5.07784	0.416205	10.407
2	5	6	56	1	1	7.4	43.4698	18.524	5.8743	0.426135	10.6243
2	5	7	57	1	1	5.2	31.5424	11.61	6.06585	0.386302	13.4861
2	6	6	66	0	1	5.2	32.2796	12.994	6.20762	0.402545	12.9957
2	6	7	67	1	1	6.4	37.7478	15.928	5.89809	0.421958	10.7275
2	7	7	77	0	1	11.74	60.0586	25.4879	5.11572	0.424385	9.95571
2	1	1	11	0	2	8.3	50.7288	21.234	6.1119	0.418579	11.7229
2	1	2	12	1	2	6.4	42.5676	18.616	6.65119	0.437328	11.4788
2	1	3	13	1	2	6.2	32.2272	14.728	5.19794	0.457005	10.6572
2	1	4	14	1	2	4.31	24.9906	10.924	5.79828	0.437124	9.7011
2	1	5	15	1	2	9	56.7074	24.824	6.30082	0.437756	12.2912
2	1	6	16	1	2	7.3	40.8088	17.074	5.59025	0.41839	11.669
2	1	7	17	1	2	5.81391	34.7615	14.8748	6.68244	0.425563	10.0891
2	2	2	22	0	2	4.4	27.4354	12.322	6.23532	0.449128	10.7953
2	2	3	23	1	2	8.2	49.6618	22.7	6.05632	0.457092	11.0318
2	2	4	24	1	2	4.55	24.527	10.442	5.39055	0.425735	10.5743
2	2	5	25	1	2	9.8	54.974	23.258	5.60959	0.423073	11.0278
2	2	6	26	1	2	8.67577	48.7728	21.0469	5.555	0.425293	10.6417
2	2	7	27	1	2	7.81	42.3482	18.546	5.4223	0.437941	9.93967
2	3	3	33	0	2	6.05	29.7352	13.2	4.91491	0.443918	10.6267
2	3	4	34	1	2	9.4	40.994	17.3281	5.85021	0.427451	9.44566
2	3	5	35	1	2	10.26	61.7938	26.068	6.02279	0.421855	11.2985
2	3	6	36	1	2	6.3	34.434	14.524	5.46571	0.421792	10.0151
2	3	7	37	1	2	13.15	73.852	33.55	5.61612	0.454287	9.21399
2	4	4	44	0	2	10.2	56.4138	23.694	5.53076	0.420004	11.2285
2	4	5	45	1	2	7.2	45.0084	19.008	5.25142	0.422321	10.0533
2	4	6	46	1	2	4.96	27.4916	10.93	5.54266	0.397576	10.9534
2	4	7	47	1	2	9.75	51.5002	21.534	5.28207	0.418134	10.4704
2	5	5	55	0	2	3.8	20.0348	8.166	5.27232	0.407591	9.90718
2	5	6	56	1	2	7.66	39.4422	17.102	5.14911	0.433597	10.229
2	5	7	57	1	2	6.4	40.9686	15.604	6.40134	0.380877	13.4775
2	6	6	66	0	2	5.5	33.4682	13.58	6.08513	0.405758	11.8949
2	6	7	67	1	2	5.8	34.0742	14.336	5.87486	0.420729	11.3699
2	7	7	77	0	2	10.2	50.5457	22.2788	4.95546	0.440766	9.49543
