# Supplementary material for: Analysis of combining ability and stability of yield characteristics of upland cotton in two years
Source: PeerJ. 2025 Jul 30;13:e19716. doi: 10.7717/peerj.19716 (PMC12317688; doi:10.7717/peerj.19716)
Supplement: Supplemental Information 2 [file peerj-13-19716-s002.xlsx]

## Sheet: Sheet1
vintages	months	highest temperature	minimum temperature	average high temperature	average low temperature
2021	1	6	-16	0	-12
	2	14	-10	9	-4
	3	21	-3	14	2
	4	32	1	20	8
	5	35	9	27	13
	6	34	14	30	17
	7	38	14	32	18
	8	34	14	29	17
	9	33	10	28	12
	10	29	0	16	3
	11	16	-10	6	-4
	12	14	-16	2	-10
2022	1	4	-15	2	-12
	2	11	-14	5	-8
	3	21	-3	16	2
	4	30	3	24	9
	5	35	11	29	15
	6	38	15	32	17
	7	39	17	32	19
	8	33	13	27	15
	9	34	10	29	13
	10	24	0	19	3
	11	17	-14	9	-4
	12	1	-16	0	-13
